# Supplementary material for: De Novo Sequencing and Hybrid Assembly of the Biofuel Crop Jatropha curcas L.: Identification of Quantitative Trait Loci for Geminivirus Resistance
Source: PubMed Central journal article supplement (PMC6356885; doi:10.3390/genes10010069), 2019-01-21

## Supplementary Tables

**Table S1:** Statistics of RNA-seq reads of 13 different *Jatropha* tissues of various developmental stages.

| S.No | Tissue                              | Raw read counts | Clean read count |
|------|-------------------------------------|-----------------|------------------|
| 1    | Plumule                             | 20,970,012      | 17,166,382       |
| 2    | Geminivirus infected leaf           | 9,332,490       | 7,735,486        |
| 3    | Developing seed 19 DAP              | 11,522,389      | 9,268,009        |
| 4    | Developing seed 33 DAP              | 10,425,440      | 8,080,963        |
| 5    | Developing seed 40 DAP              | 9,900,484       | 8,100,396        |
| 6    | Embryo from germinating seed 24 HAI | 28,187,920      | 21,290,876       |
| 7    | Embryo from germinating seed 36 HAI | 33,030,445      | 23,336,184       |
| 8    | Embryo from germinating seed 48 HAI | 37,852,720      | 27,051,944       |
| 9    | Embryo from germinating seed 72 HAI | 35,450,950      | 24,900,667       |
| 10   | Young shoot                         | 8,890,469       | 7,442,022        |
| 11   | Male bud                            | 12,511,501      | 9,158,419        |
| 12   | Radicle                             | 23,722,258      | 19,418,220       |
| 13   | Young leaf                          | 7,347,484       | 5,348,169        |

*DAP: days after pollination ; HAI: hours after imbibition*

**Table S2:** Different *Jatropha* species used in the diversity analysis for the characterization and validation of the newly developed SSRs markers.

| Region          | Species               | Accession used | Numbers |
|-----------------|-----------------------|----------------|---------|
| Asia            | <i>J. curcas</i>      | RJC1- RJC24    | 24      |
|                 | <i>J. integerrima</i> | RJIP1- RJIP8   | 8       |
| Central America | <i>J. curcas</i>      | RJCA1- RJCA14  | 14      |
|                 | <i>J. gaumeri</i>     | RJG1- RJG3     | 3       |

**Table S3.1:** Statistics of raw reads of paired-end and mate-pair libraries of RJC1.

| <b>Library type/Insert size</b>        | <b>Paired end (insert size 150bp)</b> | <b>Paired end (insert size 300bp)</b> | <b>Paired end (insert size 550bp)</b> | <b>Mate Pair (1 – 3Kb)</b> |
|----------------------------------------|---------------------------------------|---------------------------------------|---------------------------------------|----------------------------|
| <b>Number of paired end reads (bp)</b> | 79,178,765                            | 98,605,674                            | 81,412,063                            | 13,252,720                 |
| <b>Number of bases (MB)</b>            | 15,835.76                             | 19,721.14                             | 16,282.42                             | 6,626.36                   |
| <b>GC%</b>                             | 36.2                                  | 37.03                                 | 38.12                                 | 36.08                      |

**Table S3.2:** Statistics of raw reads for PacBio read libraries of RJC1.

| <b>Library type</b>         | <b>Pacbio RS II platform</b> |
|-----------------------------|------------------------------|
| <b>Number of reads</b>      | 1,202,336                    |
| <b>Number of bases (Mb)</b> | 4,722                        |
| <b>GC%</b>                  | 36.76                        |

**Table S4:** Statistics of the PacBio subread length distribution of RJC1.

| <b>Region</b>   | <b>No. of bases</b>  | <b>No. of reads</b> | <b>Mean subread Length (bp)</b> |
|-----------------|----------------------|---------------------|---------------------------------|
| <b>~ 2kb</b>    | 180,307,776          | 155,176             | 1,162                           |
| <b>~ 3kb</b>    | 231,670,997          | 95,615              | 2,423                           |
| <b>~ 4kb</b>    | 229,650,548          | 66,010              | 3,479                           |
| <b>~ 5kb</b>    | 236,849,714          | 52,822              | 4,484                           |
| <b>~ 6kb</b>    | 246,202,308          | 44,842              | 5,490                           |
| <b>~ 7kb</b>    | 253,607,557          | 39,081              | 6,489                           |
| <b>~ 8kb</b>    | 264,339,390          | 35,289              | 7,491                           |
| <b>~ 9kb</b>    | 272,146,174          | 32,050              | 8,491                           |
| <b>~ 10kb</b>   | 280,322,805          | 29,534              | 9,492                           |
| <b>&gt;10kb</b> | 2,526,829,887        | 176,558             | 14,312                          |
| <b>Total</b>    | <b>4,721,927,156</b> | <b>726,977</b>      | <b>6,495</b>                    |

**Table S5.1:** Statistics of high quality Illumina clean reads of RJC1.

| <b>Library type</b>                       | <b>Paired end<br/>(insert size<br/>150 bp)</b> | <b>Paired end<br/>(insert size<br/>300 bp)</b> | <b>Paired end<br/>(insert size<br/>550 bp)</b> | <b>Mate Pair<br/>(1 – 3 Kb)</b> |
|-------------------------------------------|------------------------------------------------|------------------------------------------------|------------------------------------------------|---------------------------------|
| <b>Number of<br/>Paired end<br/>reads</b> | 69,537,177                                     | 83,485,904                                     | 67,847,024                                     | 8,301,438                       |
| <b>Number of<br/>bases (Mbp)</b>          | 13,115.59                                      | 15,846.61                                      | 12,791.58                                      | 2,468.19                        |
| <b>GC%</b>                                | 35.7                                           | 36.6                                           | 37.6                                           | 35.6                            |

**Table S5.2:** Statistics of high quality error free PacBio reads of RJC1.

| <b>Library type</b>         | <b>PacBio RS II platform</b> |
|-----------------------------|------------------------------|
| <b>Number of reads</b>      | 4,47,402                     |
| <b>Number of bases (Mb)</b> | 1,859                        |
| <b>GC%</b>                  | 34.73                        |

**Table S6:** The table shows the DEGs [up regulated (green) and down regulated (red)] with corresponding FPKM values, fold-change, p-value, and pathway name. VI: Virus- infected leaf and YL: Young leaf

| S. No. | In-house gene IDs | Gene Names                                                    | FPKM    |         | Log2 Fold change | P value | Pathway Name                                                                               |
|--------|-------------------|---------------------------------------------------------------|---------|---------|------------------|---------|--------------------------------------------------------------------------------------------|
|        |                   |                                                               | VI      | YL      |                  |         |                                                                                            |
| 1      | g13734            | 1-deoxy-D-xylulose-5-phosphate synthase 2                     | 5.12913 | 12.8893 | -1.32            | 0.0436  | Metabolic pathways; biosynthesis of secondary metabolites; thiamine metabolism             |
| 2      | g28639            | Ein3-binding protein                                          | 33.1462 | 91.1706 | -1.46            | 0.0162  | MAPK signaling pathway; plant hormone signal transduction                                  |
| 3      | g27627            | Farnesyl diphosphate synthase                                 | 16.858  | 3.86384 | 2.13             | 0.0179  | Metabolic pathways; biosynthesis of secondary metabolites; terpenoid backbone biosynthesis |
| 4      | g29058            | ATP synthase subunit alpha, chloroplastic                     | 13.9267 | 3.86006 | 1.85             | 0.0218  | Metabolic pathways; photosynthesis; oxidative phosphorylation                              |
| 5      | g30905            | Photosystem II protein D1                                     | 13.9002 | 3.56927 | 1.96             | 0.0398  | Metabolic pathways; photosynthesis                                                         |
| 6      | g18809            |                                                               | 72.9043 | 18.675  | 1.96             | 0.0027  |                                                                                            |
| 7      | g30628            |                                                               | 41.216  | 11.2958 | 1.87             | 0.0154  |                                                                                            |
| 8      | g30283            |                                                               | 56.9478 | 20.7594 | 1.46             | 0.0171  |                                                                                            |
| 9      | g27170            | Ribulose-1,5-bisphosphate carboxylase/oxygenase large subunit | 198.11  | 72.3537 | 1.45             | 0.0109  | Metabolic pathways; carbon metabolism; carbon fixation in photosynthetic organisms         |
| 10     | g26610            |                                                               | 1408.18 | 337.866 | 2.06             | 0.0272  |                                                                                            |
| 11     | g30962            |                                                               | 16.2622 | 1.79002 | 3.18             | 0.0085  |                                                                                            |
| 12     | g6957             |                                                               | 772.216 | 268.687 | 1.52             | 0.0176  |                                                                                            |

**Table S7:** Gene ontology classification of putative genes associated with drought tolerance in the *Jatropha* genome.

| Drought related description |                                                                                                                                                                      | JC genes                                                                         |       |
|-----------------------------|----------------------------------------------------------------------------------------------------------------------------------------------------------------------|----------------------------------------------------------------------------------|-------|
| Physiological adaption      | Ion and osmotic homeostasis (stomatal movement).                                                                                                                     | 667                                                                              |       |
|                             | Growth control (root/leaf development).                                                                                                                              | 28                                                                               |       |
|                             | Detoxification (protection factor, osmolyte production, removal of ROS).                                                                                             | 196                                                                              |       |
| Molecular adaption          | Functional proteins (protection factors, phospholipid metabolism, enzyme for osmolyte biosynthesis, proteases, detoxification signaling, channels and transporters). | 431                                                                              |       |
|                             | Regulatory proteins                                                                                                                                                  | Gene expression (transcription factors, miRNA, histone modification, chromatin). | 632   |
|                             |                                                                                                                                                                      | Post translation modification (ubiquitin ligases).                               | 107   |
|                             |                                                                                                                                                                      | Signal transduction (protein kinases, protein phosphates, others).               | 1,156 |
|                             |                                                                                                                                                                      | Hormone signaling (ABA biosynthesis, ABA degradation, ABA signaling).            | 282   |
|                             |                                                                                                                                                                      | Acid anhydride hydrolases.                                                       | 36    |
| <b>Total genes</b>          |                                                                                                                                                                      | <b>3,535</b>                                                                     |       |

**Table S8:** Statistics of simple sequence repeat (SSR) markers and designed primers.

| Type of repeat        | Total no. of SSRs predicted | No. of SSR primers designed |
|-----------------------|-----------------------------|-----------------------------|
| Di nucleotide (p2)    | 18,300                      | 12,103                      |
| Tri nucleotide (p3)   | 8,574                       | 5,946                       |
| Tetra nucleotide (p4) | 1,557                       | 1,024                       |
| Penta nucleotide (p5) | 257                         | 183                         |
| Hexa nucleotide (p6)  | 122                         | 87                          |

**Table S9:** The number of markers with corresponding genetic lengths for each linkage group of *Jatropha*

| LG | No. of Markers | Length (cM) | cM/Marker |
|----|----------------|-------------|-----------|
| 1  | 40             | 885         | 22        |
| 2  | 24             | 488.2       | 20        |
| 3  | 25             | 369.7       | 15        |
| 4  | 20             | 326.8       | 16        |

|              |            |               |    |
|--------------|------------|---------------|----|
| <b>5</b>     | 7          | 87.9          | 12 |
| <b>6</b>     | 6          | 72.8          | 12 |
| <b>7</b>     | 26         | 445.1         | 17 |
| <b>8</b>     | 24         | 310.2         | 13 |
| <b>9</b>     | 10         | 84.4          | 8  |
| <b>10</b>    | 16         | 228.8         | 14 |
| <b>11</b>    | 9          | 132.3         | 14 |
| <b>Total</b> | <b>207</b> | <b>3431.2</b> |    |

**Table S10:** Summary of the minor QTLs detected in RJC1 with marker intervals, corresponding LODs and estimated linkage distances of QTLs in Kosambi centimorgans (cM).

| <b>S.No</b> | <b>QTL</b> | <b>Marker Interval</b> | <b>LOD</b> | <b>cM distance</b> | <b>Major putative genes</b>                                                                                                                                                                                                             |
|-------------|------------|------------------------|------------|--------------------|-----------------------------------------------------------------------------------------------------------------------------------------------------------------------------------------------------------------------------------------|
| <b>1</b>    | qJMV-3     | RJM613 - RJM1472       | 4.5        | 37.0               | AP2-like ethylene-responsive transcription factor<br>ANT, cytochrome P450 93A3-like                                                                                                                                                     |
| <b>2</b>    | qJMV-4     | RJM236 - RJM1157       | 3.1        | 30.6               | Retrovirus-related Pol polyprotein from transposon<br>TNT 1-94;<br>Serine/threonine-protein kinase ATR isoform X2;<br>Taxadiene 5-alpha hydroxylase                                                                                     |
| <b>3</b>    | qJMV-10    | RJM1836 - RJM2234      | 3.3        | 43.6               | Cytochrome P450 93A3-like;<br>Probable LRR receptor-like serine/threonine-protein<br>kinase At3g47570;<br>TMV resistance protein N-like isoform X1;<br>Serine/threonine-protein kinase ATR isoform X2;<br>Taxadiene 5-alpha hydroxylase |

## Supplementary Figures

**Figure S1:** Sequencing summary of PacBio reads.

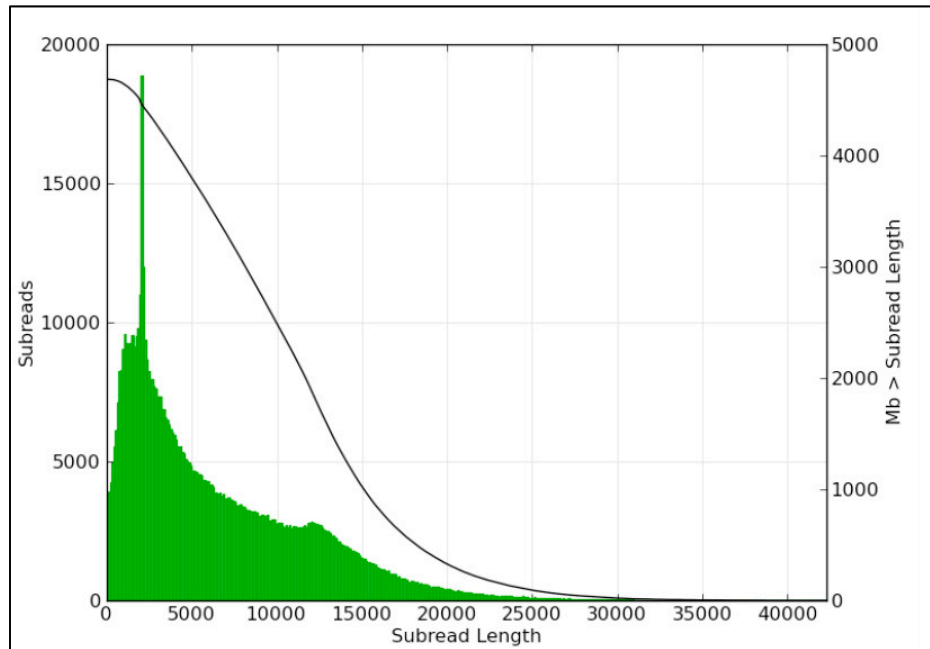

**Figure S2:** RJC1 amino acid sequence distribution in various KEGG pathways.

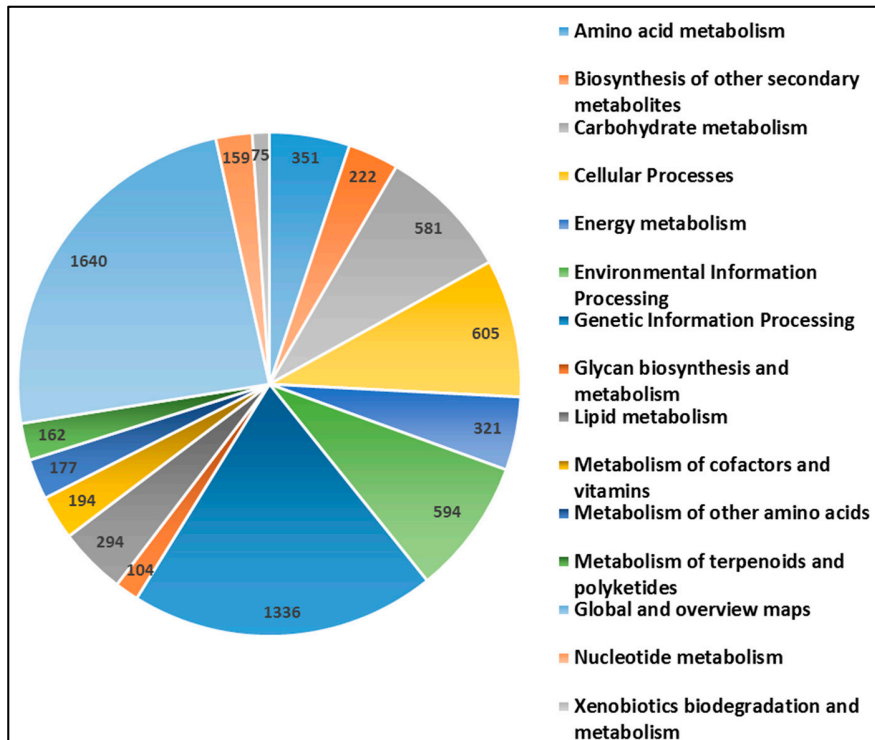



**Figure S3:** Log2FPKM (Fragments Per Kilobase of exon per Million fragments mapped) values of 620 differentially expressed genes in geminivirus-infected and young leaves from RNA-seq experiments.

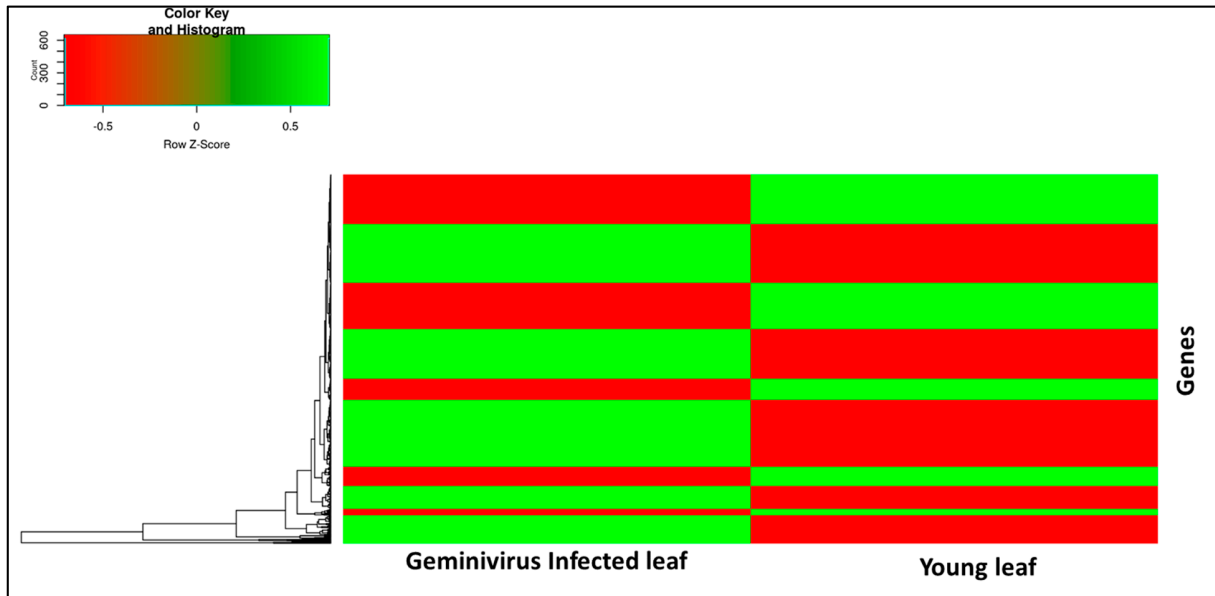

**Figure S4:** Genetic relationship between 49 *Jatropha* accessions by UPGMA cluster analysis. The Y-axis depicts the two major groups including Asiatic (*J. curcas* [RJC: 1-24]; *J. integerrima* [RJIP: 1-8]) and Central American (*J. curcas* [RJCA: 1-14]; *J. gaumeri* [RJG: 1-3]) lines.

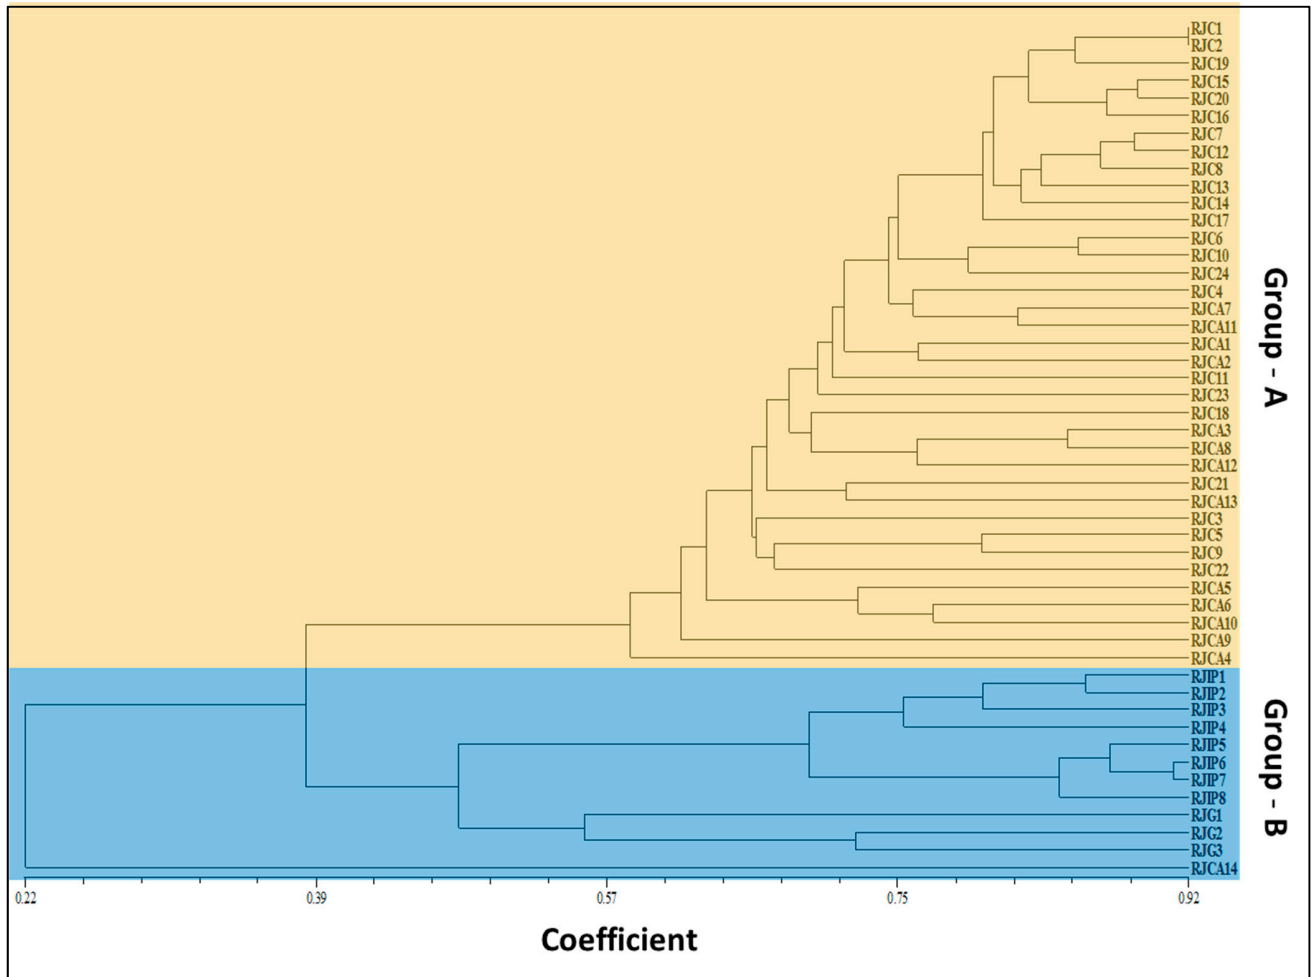

Supplement: genes-10-00069-s001.pdf [file genes-10-00069-s001.pdf]
